# Supplementary material for: Patterns for addition to C59BHElectronic supplementary information (ESI) available: Heats of formation and single-point energies for heterofullerenes. See http://www.rsc.org/suppdata/cp/b3/b300458a/
Source: Royal Society of Chemistry journal article supplement (doi:10.1039/b300458a), 2003-03-25
Supplement: table.doc [file table.doc]

**Table 1 The heats of formation (kcal mol-1) and single point energies (a.u.) for C59BH3 isomers**

| Isomer | Equivalent isomer | Type of addition | Heat of formation | | Esp  HF/6-31G//AM1 |
| --- | --- | --- | --- | --- | --- |
| AM1 | MNDO |
| C59BH |  |  | 952.90 | 831.55 |  |
| 5,6 | 2,12 | 1-2 | 906.95 | 787.89 | -2259.5969 |
| 5,19 | 2,14 | 1-4 | 910.56 | 790.16 | -2259.5600 |
| 44,45 |  | 1-2 | 910.70 | 790.38 | -2259.5453 |
| 21,40 | 30,31 | 1-2 | 910.73 | 790.40 | -2259.5525 |
| 41,42 | 47,48 | 1-2 | 910.75 | 790.33 |  |
| 16,17 |  | 1-2 | 910.86 | 790.55 |  |
| 43,57 | 46,58 | 1-2 | 910.89 | 790.53 |  |
| 32,33 | 38,39 | 1-2 | 910.92 | 790.58 |  |
| 52,60 |  | 1-2 | 911.01 | 790.67 |  |
| 34,35 | 36,37 | 1-2 | 911.03 | 790.70 |  |
| 50,51 | 53,54 | 1-2 | 911.06 | 790.70 |  |
| 7,24 | 11,27 | 1-4 | 911.08 | 790.20 | -2259.5466 |
| 49,59 | 55,56 | 1-2 | 911.09 | 790.72 |  |
| 6,18 | 12,15 | 1-4 | 911.93 | 790.96 |  |
| 7,8 | 10,11 | 1-2 | 912.66 | 792.75 |  |
| 13,14 | 19,20 | 1-2 | 912.84 | 792.32 |  |
| 3,15 | 4,18 | 1-2 | 913.24 | 791.74 |  |
| 22,23 | 28,29 | 1-2 | 913.58 | 793.04 |  |
| 24,25 | 26,27 | 1-2 | 914.75 | 793.94 |  |
| 41,57 | 48,58 | 1-4 | 914.97 | 793.34 |  |
| 16,36 | 17,35 | 1-4 | 914.97 | 793.38 |  |
| 42,56 | 47,59 | 1-4 | 915.07 | 793.40 |  |
| 32,35 | 36,39 | 1-4 | 915.14 | 793.59 |  |
| 44,58 | 45,57 | 1-4 | 915.17 | 793.54 |  |
| 33,51 | 38,53 | 1-4 | 915.28 | 793.70 |  |
| 8,23 | 10,28 | 1-4 | 915.33 | 793.98 |  |
| 21,42 | 30,47 | 1-4 | 915.36 | 793.66 |  |
| 21,38 | 30,33 | 1-4 | 915.36 | 793.74 |  |
| 43,46 |  | 1-4 | 915.43 | 793.76 |  |
| 51,59 | 53,56 | 1-4 | 915.44 | 793.83 |  |
| 43,55 | 46,49 | 1-4 | 915.46 | 793.80 |  |
| 34,50 | 37,54 | 1-4 | 915.61 | 793.96 |  |
| 34,37 |  | 1-4 | 915.61 | 793.96 |  |
| 50,60 | 54,60 | 1-4 | 915.67 | 793.97 |  |
| 49,52 | 52,55 | 1-4 | 915.70 | 794.03 |  |
| 14,31 | 19,40 | 1-4 | 915.75 | 793.99 |  |
| 2,10 | 5,8 | 1-4 | 916.10 | 795.64 |  |
| 23,40 | 28,31 | 1-4 | 916.27 | 794.58 |  |
| 13,32 | 20,39 | 1-4 | 917.36 | 795.51 |  |
| 24,27 |  | 1-4 | 917.42 | 795.76 |  |
| 3,17 | 4,16 | 1-4 | 917.57 | 794.89 |  |
| 22,41 | 29,48 | 1-4 | 918.26 | 796.42 |  |
| 3,13 | 4,20 | 1-4 | 918.45 | 795.81 |  |
| 15,18 |  | 1-4 | 919.07 | 797.02 |  |
| 25,45 | 26,44 | 1-4 | 919.11 | 797.05 |  |
| 22,25 | 26,29 | 1-4 | 920.40 | 798.31 |  |

**Table 2 The heats of formation (kcal mol-1) and single point energies (a.u.) for C59BHF2 isomers**

| Isomer | Equivalent isomer | Type of addition | Heat of formation | | Esp |
| --- | --- | --- | --- | --- | --- |
| AM1 | MNDO | HF/6-31G//AM1 |
| 7,24 | 11,27 | 1,4 | 843.84 | 715.78 | -2457.1861 |
| 44,45 |  | 1,2 | 843.95 | 718.68 | -2457.1837 |
| 41,42 | 47,48 | 1,2 | 843.96 | 718.57 | -2457.1832 |
| 16,17 |  | 1,2 | 844.00 | 718.69 |  |
| 21,40 | 30,31 | 1,2 | 844.04 | 718.77 |  |
| 7,8 | 10,11 | 1,2 | 844.05 | 721.75 |  |
| 43,57 | 46,58 | 1,2 | 844.18 | 718.83 |  |
| 34,35 | 36,37 | 1,2 | 844.30 | 718.98 |  |
| 32,33 | 38,39 | 1,2 | 844.32 | 719.01 |  |
| 52,60 |  | 1,2 | 844.41 | 719.09 |  |
| 50,51 | 53,54 | 1,2 | 844.43 | 719.09 |  |
| 49,59 | 55,56 | 1,2 | 844.44 | 719.09 |  |
| 6,18 | 12,15 | 1,4 | 845.08 | 716.61 | -2457.1840 |
| 5,6 | 2,12 | 1,2 | 846.00 | 720.30 |  |
| 13,14 | 19,20 | 1,2 | 846.41 | 720.95 |  |
| 3,15 | 4,18 | 1,2 | 846.57 | 720.07 |  |
| 8,23 | 10,28 | 1,4 | 846.65 | 719.65 |  |
| 22,23 | 28,29 | 1,2 | 846.74 | 721.42 |  |
| 24,25 | 26,27 | 1,2 | 847.69 | 722.39 |  |
| 16,36 | 17,35 | 1,4 | 847.91 | 718.71 |  |
| 41,57 | 48,58 | 1,4 | 848.04 | 718.78 |  |
| 42,56 | 47,59 | 1,4 | 848.09 | 718.81 |  |
| 44,58 | 45,57 | 1,4 | 848.19 | 718.96 |  |
| 32,35 | 36,39 | 1,4 | 848.26 | 719.08 |  |
| 21,42 | 30,47 | 1,4 | 848.43 | 719.13 |  |
| 33,51 | 38,53 | 1,4 | 848.47 | 719.26 |  |
| 43,46 |  | 1,4 | 848.48 | 719.17 |  |
| 43,55 | 46,49 | 1,4 | 848.54 | 719.24 |  |
| 51,59 | 53,56 | 1,4 | 848.58 | 719.34 |  |
| 34,37 |  | 1,4 | 848.61 | 719.33 |  |
| 21,38 | 30,33 | 1,4 | 848.63 | 719.39 |  |
| 14,31 | 19,40 | 1,4 | 848.71 | 719.38 |  |
| 34,50 | 37,54 | 1,4 | 848.72 | 719.44 |  |
| 50,60 | 54,60 | 1,4 | 848.85 | 719.52 |  |
| 49,52 | 52,55 | 1,4 | 848.88 | 719.56 |  |
| 2,14 | 5,19 | 1,4 | 848.90 | 719.29 |  |
| 23,40 | 28,31 | 1,4 | 849.20 | 719.97 |  |
| 24,27 |  | 1,4 | 850.43 | 721.32 |  |
| 3,17 | 4,16 | 1,4 | 850.75 | 720.25 |  |
| 13,32 | 20,39 | 1,4 | 850.82 | 721.37 |  |
| 22,41 | 29,48 | 1,4 | 851.27 | 721.93 |  |
| 15,18 |  | 1,4 | 852.04 | 722.42 |  |
| 25,45 | 26,44 | 1,4 | 852.09 | 722.65 |  |
| 3,13 | 4,20 | 1,4 | 852.11 | 721.72 |  |
| 22,25 | 26,29 | 1,4 | 853.27 | 723.99 |  |
| 2,10 | 5,8 | 1,4 | 853.41 | 725.51 |  |

**Table 3 The heats of formation (kcal mol-1) for C59BH5** isomers

| Isomer | Type of addition | Heats of formation |  |
| --- | --- | --- | --- |
| AM1 | MNDO |
| 7,24,11,27 | 1,4/1,4 | 862.74 | 743.04 |
| 5,6,2,12 | 1,2/1,2 | 863.25 | 746.79 |
| 5,6,12,15 | 1,2/1,4 | 864.26 | 745.61 |
| 5,6,19,40 | 1,2/1,4 | 864.61 | 746.29 |
| 5,6,30,31 | 1,2/1,2 | 864.73 | 746.50 |
| 5,6,44,45 | 1,2/1,2 | 864.76 | 746.53 |
| 5,6,36,37 | 1,2/1,2 | 864.83 | 746.64 |
| 5,6,41,42 | 1,2/1,2 | 864.87 | 746.58 |
| 5,6,32,33 | 1,2/1,2 | 864.88 | 746.69 |
| 5,6,11,27 | 1,2/1,4 | 864.90 | 746.19 |
| 5,6,53,54 | 1,2/1,2 | 864.97 | 746.70 |
| 5,6,47,48 | 1,2/1,2 | 865.00 | 746.75 |
| 5,6,34,35 | 1,2/1,2 | 865.05 | 746.78 |
| 5,6,43,57 | 1,2/1,2 | 865.13 | 746.88 |
| 5,6,46,58 | 1,2/1,2 | 865.29 | 747.02 |
| 5,6,55,56 | 1,2/1,2 | 865.30 | 747.03 |
| 5,6,49,59 | 1,2/1,2 | 865.46 | 747.24 |
| 5,6,52,60 | 1,2/1,2 | 865.46 | 747.23 |
| 5,6,50,51 | 1,2/1,2 | 865.53 | 747.28 |
| 5,6,10,11 | 1,2/1,2 | 866.11 | 748.47 |
| 5,6,16,17 | 1,2/1,2 | 867.08 | 748.67 |
| 5,6,2,14 | 1,2/1,4 | 867.16 | 749.25 |
| 5,6,38,39 | 1,2/1,2 | 867.19 | 748.73 |
| 5,6,19,20 | 1,2/1,2 | 867.44 | 750.19 |
| 5,6,15,18 | 1,2/1,4 | 867.47 | 749.00 |
| 6,18,12,15 | 1,4/1,4 | 867.51 | 747.55 |
| 5,6,13,14 | 1,2/1,2 | 867.53 | 749.11 |
| 5,6,28,29 | 1,2/1,2 | 867.62 | 749.13 |
| 5,6,21,40 | 1,2/1,2 | 868.29 | 749.63 |
| 5,6,26,27 | 1,2/1,2 | 868.45 | 749.74 |
| 5,6,41,57 | 1,2/1,4 | 869.13 | 749.66 |
| 5,6,45,57 | 1,2/1,4 | 869.14 | 749.68 |
| 5,6,10,28 | 1,2/1,4 | 869.16 | 750.04 |
| 5,6,30,33 | 1,2/1,4 | 869.22 | 749.69 |
| 5,6,44,58 | 1,2/1,4 | 869.23 | 749.72 |
| 5,6,30,47 | 1,2/1,4 | 869.24 | 749.66 |
| 5,6,42,56 | 1,2/1,4 | 869.27 | 749.75 |
| 5,6,32,35 | 1,2/1,4 | 869.31 | 749.79 |
| 5,6,37,54 | 1,2/1,4 | 869.32 | 749.81 |
| 5,6,34,37 | 1,2/1,4 | 869.36 | 749.84 |
| 5,6,33,51 | 1,2/1,4 | 869.39 | 749.88 |
| 5,6,48,58 | 1,2/1,4 | 869.39 | 749.91 |
| 5,6,53,56 | 1,2/1,4 | 869.47 | 749.96 |
| 5,6,47,59 | 1,2/1,4 | 869.54 | 749.98 |
| 5,6,54,60 | 1,2/1,4 | 869.56 | 749.99 |
| 5,6,34,50 | 1,2/1,4 | 869.56 | 750.03 |
| 5,6,24,25 | 1,2/1,2 | 869.68 | 751.12 |
| 5,6,43,55 | 1,2/1,4 | 869.76 | 750.13 |
| 5,6,16.36 | 1,2/1,4 | 869.77 | 750.12 |
| 5,6,43,46 | 1,2/1,4 | 869.77 | 750.14 |
| 5,6,50,60 | 1,2/1,4 | 869.88 | 750.41 |
| 5,6,22,23 | 1,2/1,2 | 869.93 | 751.38 |
| 5,6,51,59 | 1,2/1,4 | 869.93 | 750.43 |
| 5,6,46,49 | 1,2/1,4 | 870.05 | 750.43 |
| 5,6,52,55 | 1,2/1,4 | 870.07 | 750.42 |
| 5,6,20,39 | 1,2/1,4 | 870.07 | 751.26 |
| 5,6,4,18 | 1,2/1,2 | 870.14 | 751.86 |
| 5,6,49,52 | 1,2/1,4 | 870.26 | 750.66 |
| 5,6,36,39 | 1,2/1,4 | 870.30 | 750.58 |
| 5,6,28,31 | 1,2/1,4 | 870.32 | 750.67 |
| 5,6,14,31 | 1,2/1,4 | 870.63 | 751.03 |
| 2,14,5,19 | 1,4/1,4 | 870.99 | 751.66 |
| 5,6,8,23 | 1,2/1,4 | 871.32 | 753.17 |
| 5,6,17,35 | 1,2/1,4 | 871.65 | 751.95 |
| 5,6,23,40 | 1,2/1,4 | 871.81 | 751.99 |
| 5,6,38,53 | 1,2/1,4 | 871.96 | 752.26 |
| 5,6,24,27 | 1,2/1,4 | 872.06 | 752.22 |
| 5,6,13,32 | 1,2/1,4 | 872.24 | 752.51 |
| 5,6,29,48 | 1,2/1,4 | 872.31 | 752.58 |
| 5,6,2,10 | 1,2/1,4 | 872.33 | 754.42 |
| 5,6,4,16 | 1,2/1,4 | 872.59 | 752.82 |
| 5,6,3,15 | 1,2/1,2 | 872.68 | 753.08 |
| 5,6,26,44 | 1,2/1,4 | 872.90 | 752.90 |
| 5,6,21,42 | 1,2/1,4 | 873.02 | 753.00 |
| 5,6,7,24 | 1,2/1,4 | 873.21 | 754.76 |
| 5,6,21,38 | 1,2/1,4 | 873.84 | 753.94 |
| 5,6,25,45 | 1,2/1,4 | 874.08 | 754.27 |
| 5,6,26,29 | 1,2/1,4 | 874.10 | 754.12 |
| 5,6,22,41 | 1,2/1,4 | 874.47 | 754.57 |
| 5,6,22,25 | 1,2/1,4 | 877.14 | 757.27 |
| 5,6,7,8 | 1,2/1,2 | 877.56 | 760.40 |
| 5,6,3,13 | 1,2/1,4 | 878.20 | 757.35 |
| 5,6,3,17 | 1,2/1,4 | 878.43 | 757.55 |
| 5,6,4,20 | 1,2/1,4 | 878.50 | 758.98 |

**Table 4 The heats of formation (kcal mol-1) for C59BHF4** isomers

| Isomer | Type of addition | Heats of formation | |
| --- | --- | --- | --- |
| AM1 | MNDO |
| 7,24,11,27 | 1,4/1,4 | 726.78 | 593.90 |
| 7,24,47,48 | 1,4/1,2 | 734.18 | 602.42 |
| 7,24,45,57 | 1,4/1,4 | 734.52 | 600.52 |
| 7,24,26,27 | 1,4/1,2 | 734.55 | 605.13 |
| 7,24,44,45 | 1,4/1,2 | 734.59 | 607.10 |
| 7,24,55,56 | 1,4/1,2 | 734.77 | 603.04 |
| 7,24,30,31 | 1,4/1,2 | 734.79 | 602.93 |
| 7,24,16,17 | 1,4/1,2 | 734.92 | 603.04 |
| 7,24,38,39 | 1,4/1,2 | 735.08 | 603.38 |
| 7,24,49,59 | 1,4/1,2 | 735.08 | 603.19 |
| 7,24,12,15 | 1,4/1,4 | 735.14 | 600.17 |
| 7,24,53,54 | 1,4/1,2 | 735.26 | 603.31 |
| 7,24,36,37 | 1,4/1,2 | 735.33 | 603.42 |
| 7,24,32,33 | 1,4/1,2 | 735.47 | 603.64 |
| 7,24,52,60 | 1,4/1,2 | 735.47 | 603.55 |
| 7,24,34,35 | 1,4/1,2 | 735.52 | 603.62 |
| 7,24,10,11 | 1,4/1,2 | 735.59 | 607.06 |
| 7,24,50,51 | 1,4/1,2 | 735.75 | 603.82 |
| 7,24,2,12 | 1,4/1,2 | 736.58 | 604.50 |
| 7,24,44,58 | 1,4/1,4 | 736.60 | 604.26 |
| 7,24,13,14 | 1,4/1,2 | 737.29 | 605.25 |
| 7,24,46,58 | 1,4/1,2 | 737.45 | 605.75 |
| 7,24,3,15 | 1,4/1,2 | 737.58 | 604.62 |
| 7,24,47,59 | 1,4/1,4 | 738.29 | 602.56 |
| 7,24,23,40 | 1,4/1,4 | 738.47 | 607.18 |
| 7,24,43,57 | 1,4/1,2 | 738.50 | 607.02 |
| 7,24,30,47 | 1,4/1,4 | 738.64 | 602.88 |
| 7,24,22,41 | 1,4/1,4 | 738.71 | 607.46 |
| 7,24,16.36 | 1,4/1,4 | 738.82 | 603.09 |
| 7,24,36,39 | 1,4/1,4 | 738.83 | 603.22 |
| 7,24,53,56 | 1,4/1,4 | 738.91 | 603.22 |
| 7,24,10,28 | 1,4/1,4 | 738.95 | 605.67 |
| 7,24,17,35 | 1,4/1,4 | 738.99 | 603.19 |
| 7,24,38,53 | 1,4/1,4 | 739.01 | 603.39 |
| 7,24,4,18 | 1,4/1,2 | 739.05 | 606.39 |
| 7,24,28,29 | 1,4/1,2 | 739.06 | 607.02 |
| 7,24,51,59 | 1,4/1,4 | 739.07 | 603.30 |
| 7,24,52,55 | 1,4/1,4 | 739.15 | 603.42 |
| 7,24,30,33 | 1,4/1,4 | 739.20 | 603.40 |
| 7,24,49,52 | 1,4/1,4 | 739.46 | 603.66 |
| 7,24,33,51 | 1,4/1,4 | 739.51 | 603.80 |
| 7,24,19,20 | 1,4/1,2 | 739.56 | 608.26 |
| 7,24,32,35 | 1,4/1,4 | 739.56 | 603.81 |
| 7,24,41,42 | 1,4/1,2 | 739.59 | 608.57 |
| 7,24,37,54 | 1,4/1,4 | 739.62 | 603.72 |
| 7,24,21,40 | 1,4/1,2 | 739.70 | 608.71 |
| 7,24,14,31 | 1,4/1,4 | 739.74 | 603.79 |
| 7,24,54,60 | 1,4/1,4 | 739.81 | 603.85 |
| 7,24,34,37 | 1,4/1,4 | 739.92 | 603.98 |
| 7,24,26,29 | 1,4/1,4 | 739.98 | 605.86 |
| 7,24,2,14 | 1,4/1,4 | 740.00 | 604.00 |
| 7,24,48,58 | 1,4/1,4 | 740.19 | 604.30 |
| 7,24,50,60 | 1,4/1,4 | 740.24 | 604.25 |
| 7,24,34,50 | 1,4/1,4 | 740.37 | 604.41 |
| 7,24,6,18 | 1,4/1,4 | 740.44 | 608.36 |
| 7,24,22,23 | 1,4/1,2 | 740.50 | 617.00 |
| 7,24,19,40 | 1,4/1,4 | 741.61 | 606.13 |
| 7,24,41,57 | 1,4/1,4 | 741.76 | 606.28 |
| 7,24,13,32 | 1,4/1,4 | 741.81 | 605.80 |
| 7,24,3,17 | 1,4/1,4 | 741.87 | 604.87 |
| 7,24,28,31 | 1,4/1,4 | 742.04 | 606.10 |
| 7,24,46,49 | 1,4/1,4 | 742.07 | 606.35 |
| 7,24,5,19 | 1,4/1,4 | 742.27 | 607.34 |
| 7,24,26,44 | 1,4/1,4 | 742.79 | 611.04 |
| 7,24,29,48 | 1,4/1,4 | 742.95 | 606.93 |
| 7,24,43,55 | 1,4/1,4 | 743.03 | 607.33 |
| 7,24,15,18 | 1,4/1,4 | 743.08 | 607.02 |
| 7,24,4,16 | 1,4/1,4 | 743.09 | 606.38 |
| 7,24,3,13 | 1,4/1,4 | 743.14 | 606.25 |
| 7,24,43,46 | 1,4/1,4 | 744.00 | 608.60 |
| 7,24,20,39 | 1,4/1,4 | 744.06 | 608.46 |
| 7,24,42,56 | 1,4/1,4 | 744.08 | 608.74 |
| 7,24,5,6 | 1,4/1,2 | 744.21 | 616.20 |
| 7,24,21,38 | 1,4/1,4 | 744.60 | 609.26 |
| 7,24,2,10 | 1,4/1,4 | 745.86 | 611.79 |
| 7,24,4,20 | 1,4/1,4 | 746.46 | 610.25 |
| 7,24,21,42 | 1,4/1,4 | 747.23 | 612.58 |
